# Supplementary material
Source: publisher site journal article supplement (http://www.e-cmh.org/upload/media/cmh-2024-0028-Supplementary-Figure-1.pdf)

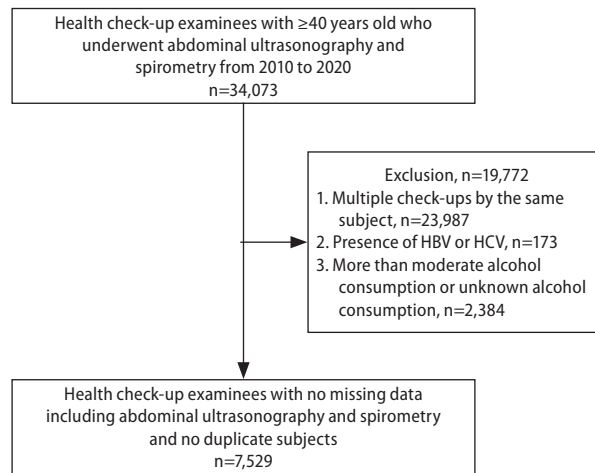

**Supplementary Figure 1.** Study selection process.

Supplement: Supplementary file 1 [file cmh-2024-0028-Supplementary-Figure-1.pdf]
